# Supplementary material for: SOX1 Functions as a Tumor Suppressor by Repressing HES1 in Lung Cancer
Source: MDPI journal article supplement (doi:10.3390/cancers15082207), 2023-04-08

Figure S1E

## Full blot

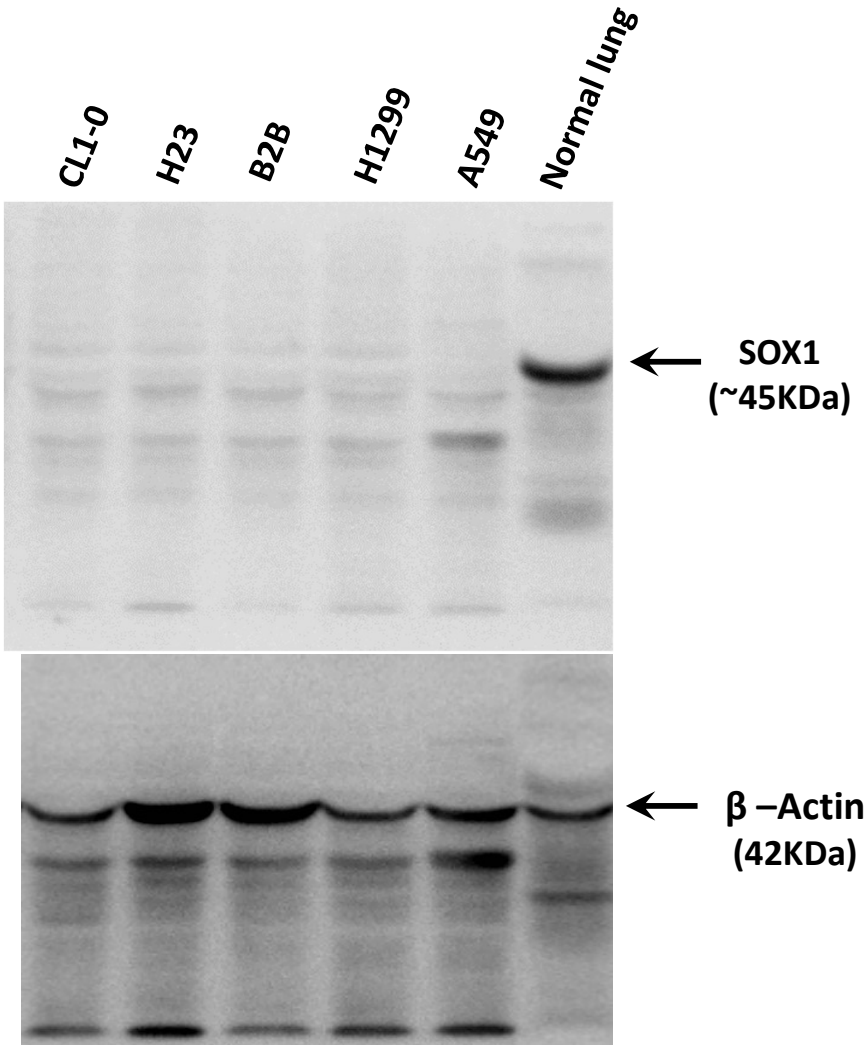

Replicate  
Figure 1E Full blot

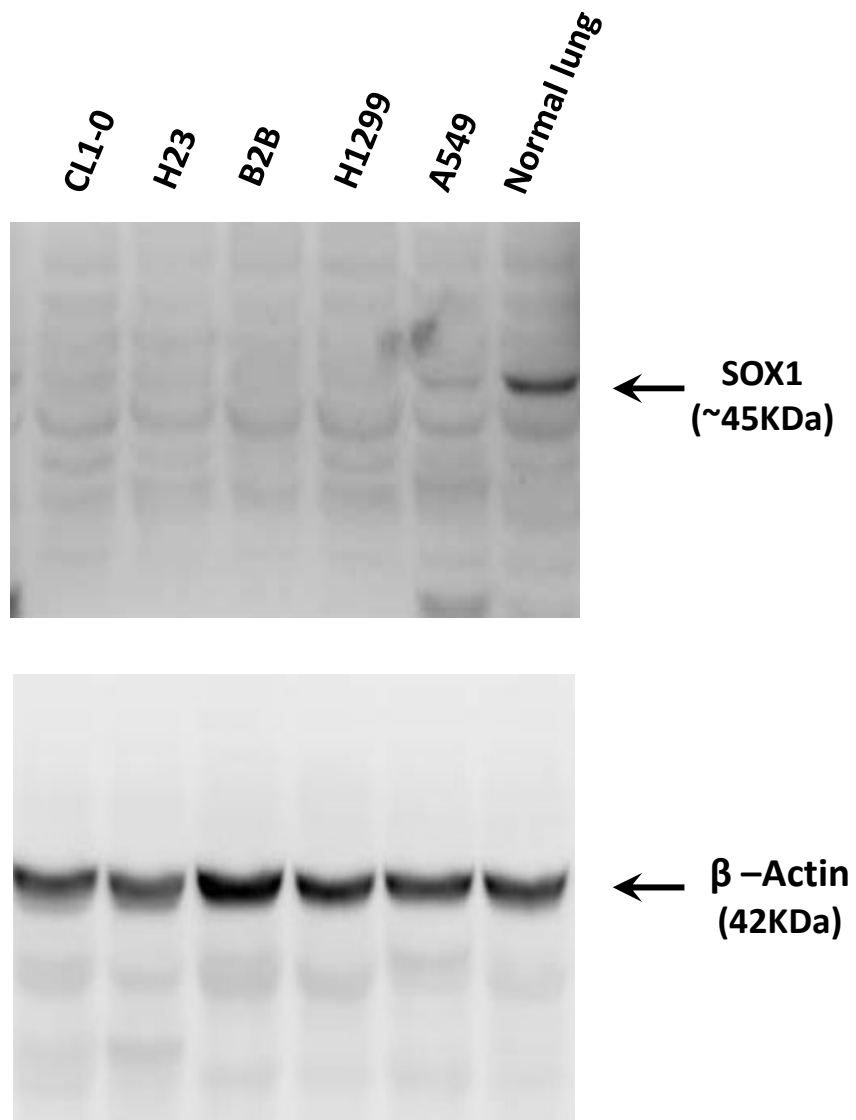

Figure 2 western blot full blot

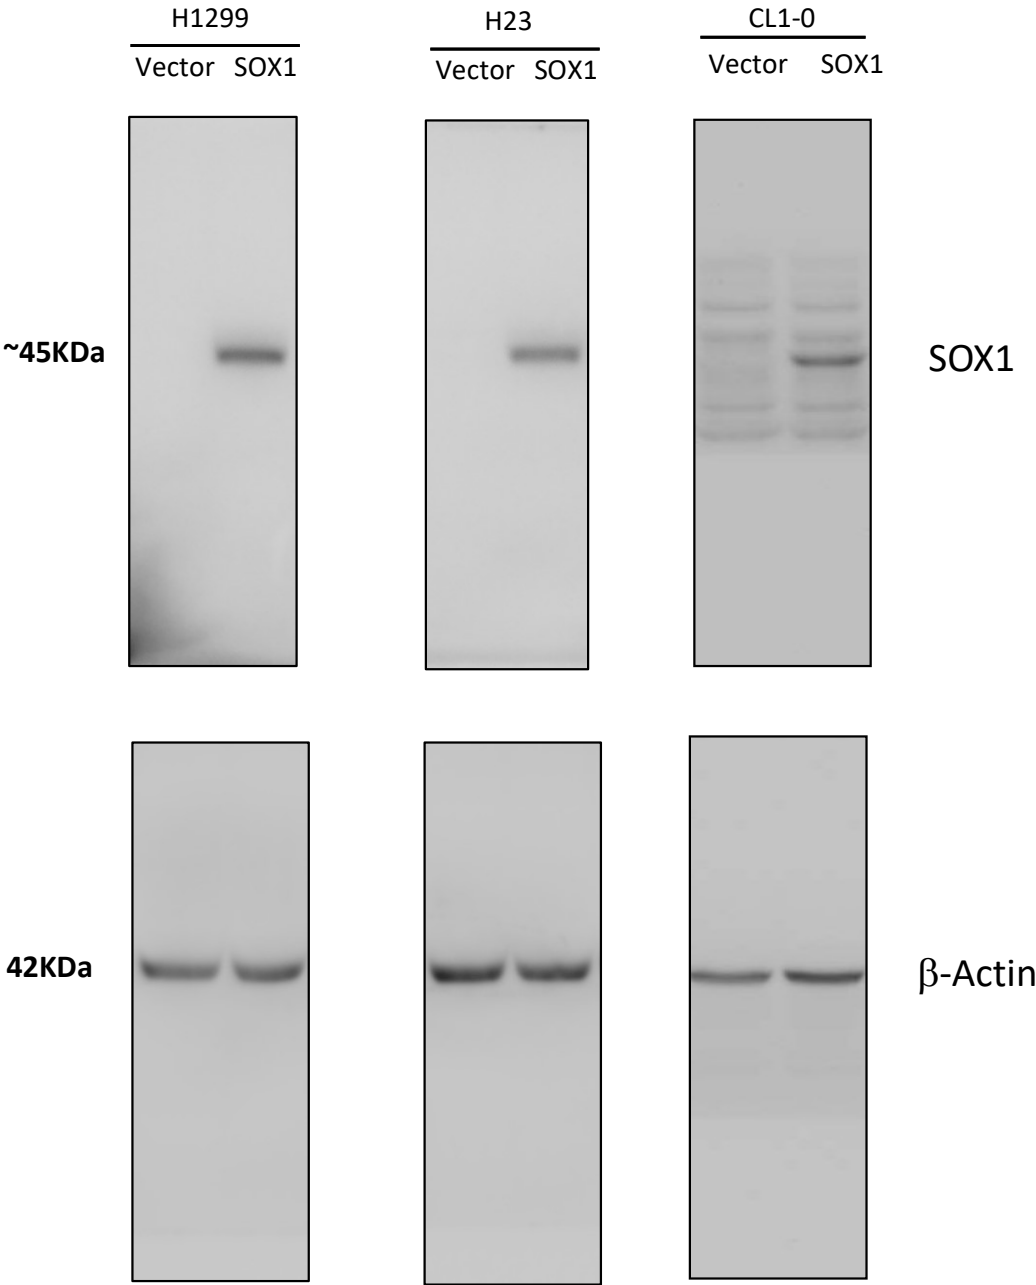

Replicate  
Figure 2 western blot full blot

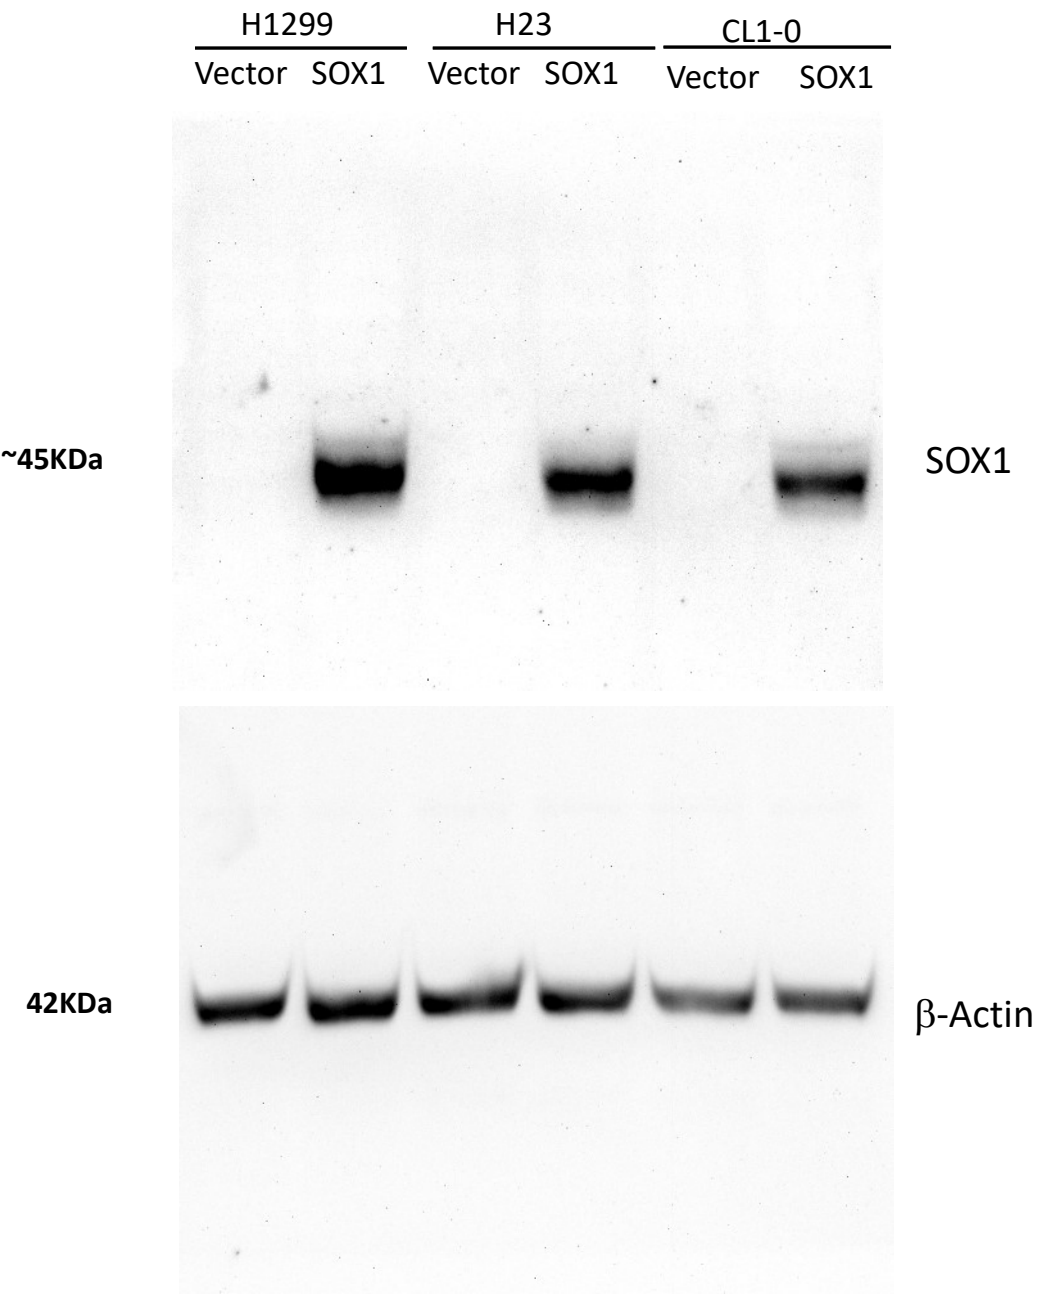

Figure 3 full blot (tissues, only one western blot)

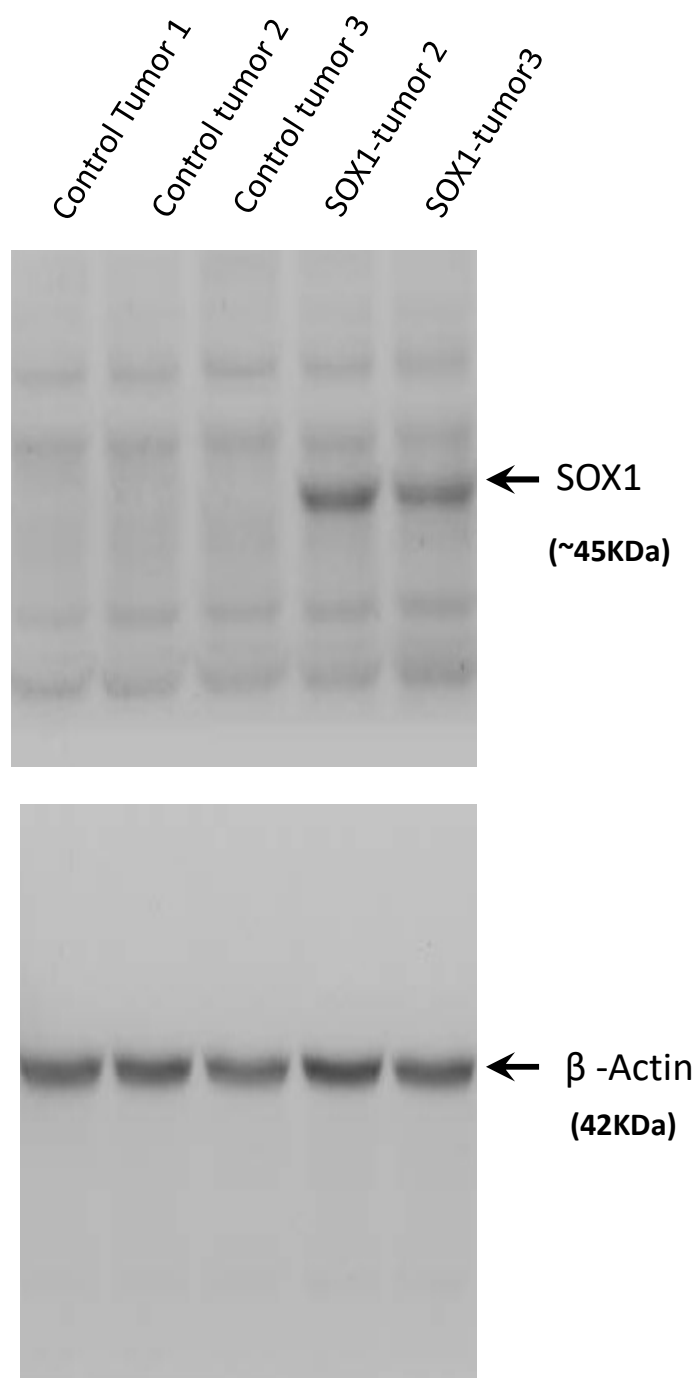

Figure 4 full blot

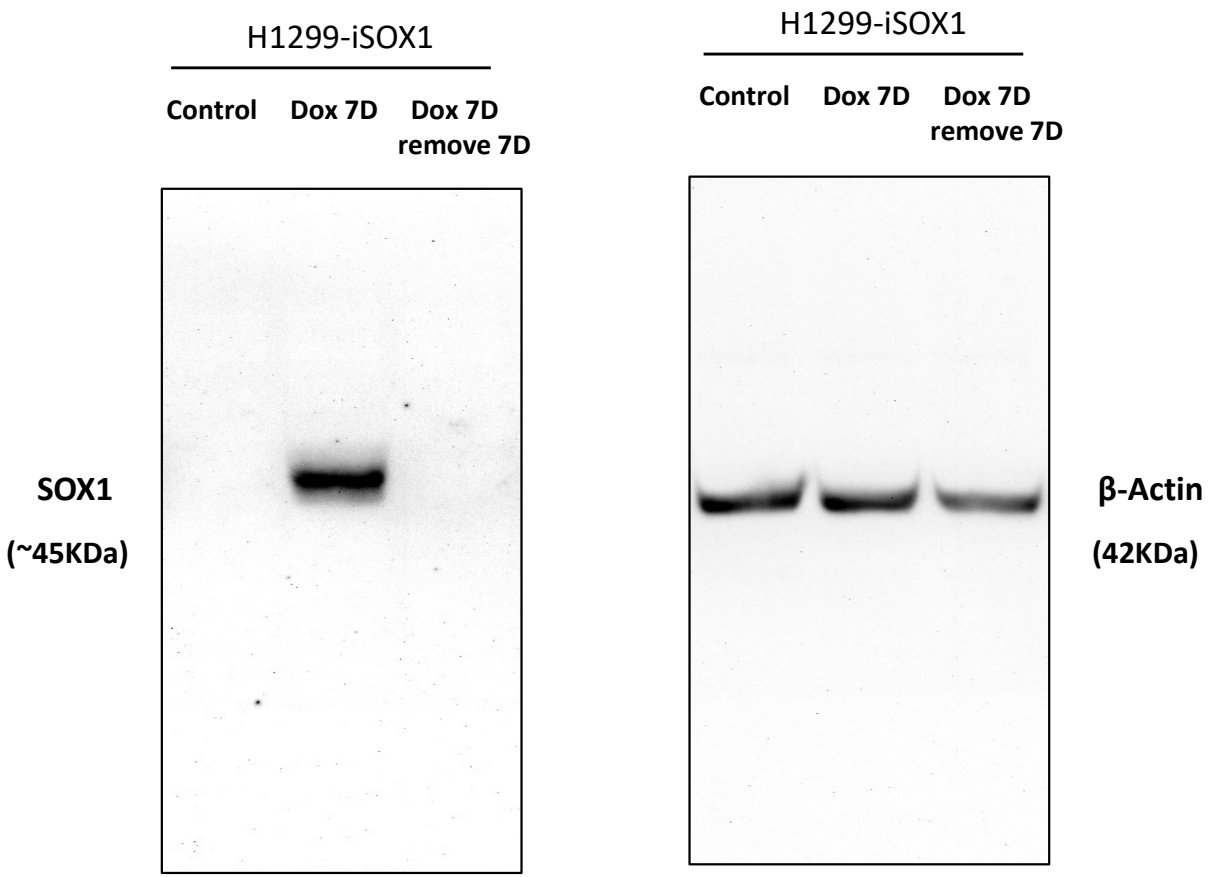

Figure 4 full blot (replicate)

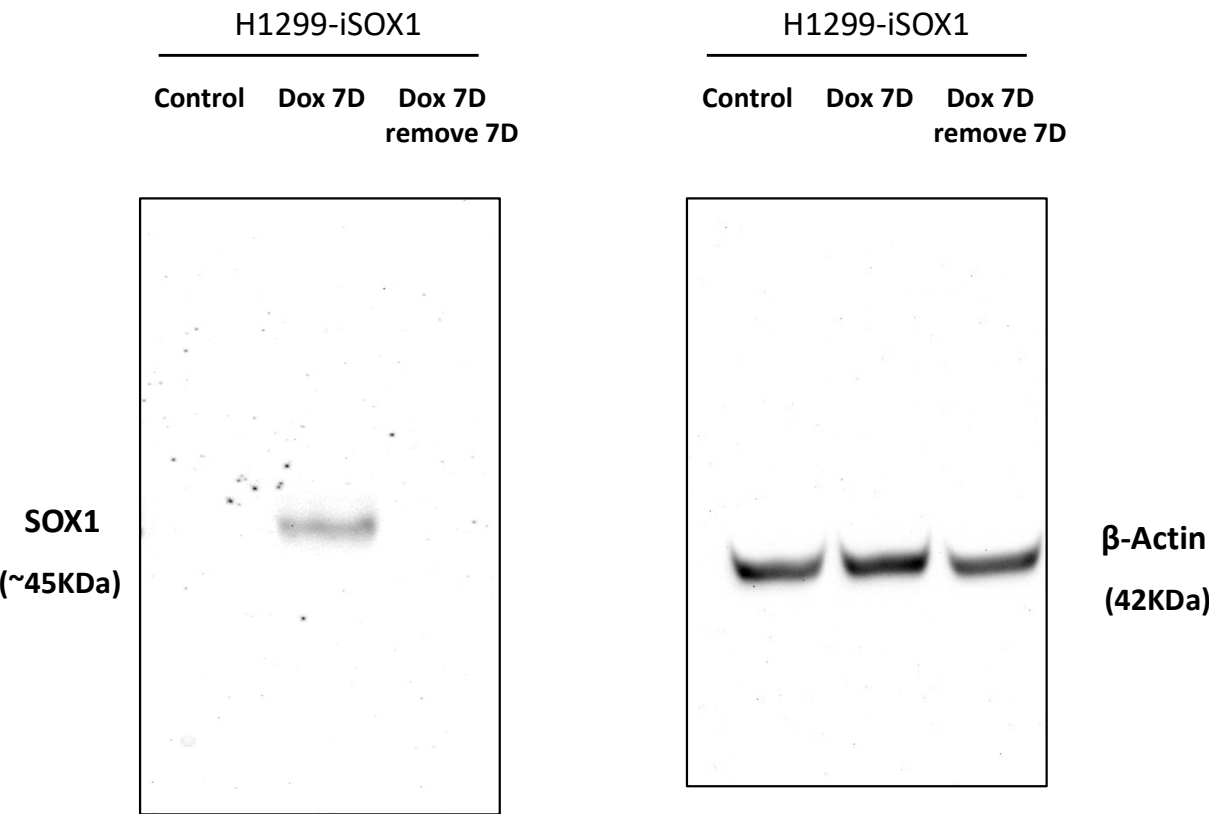

Figure 5 full blot

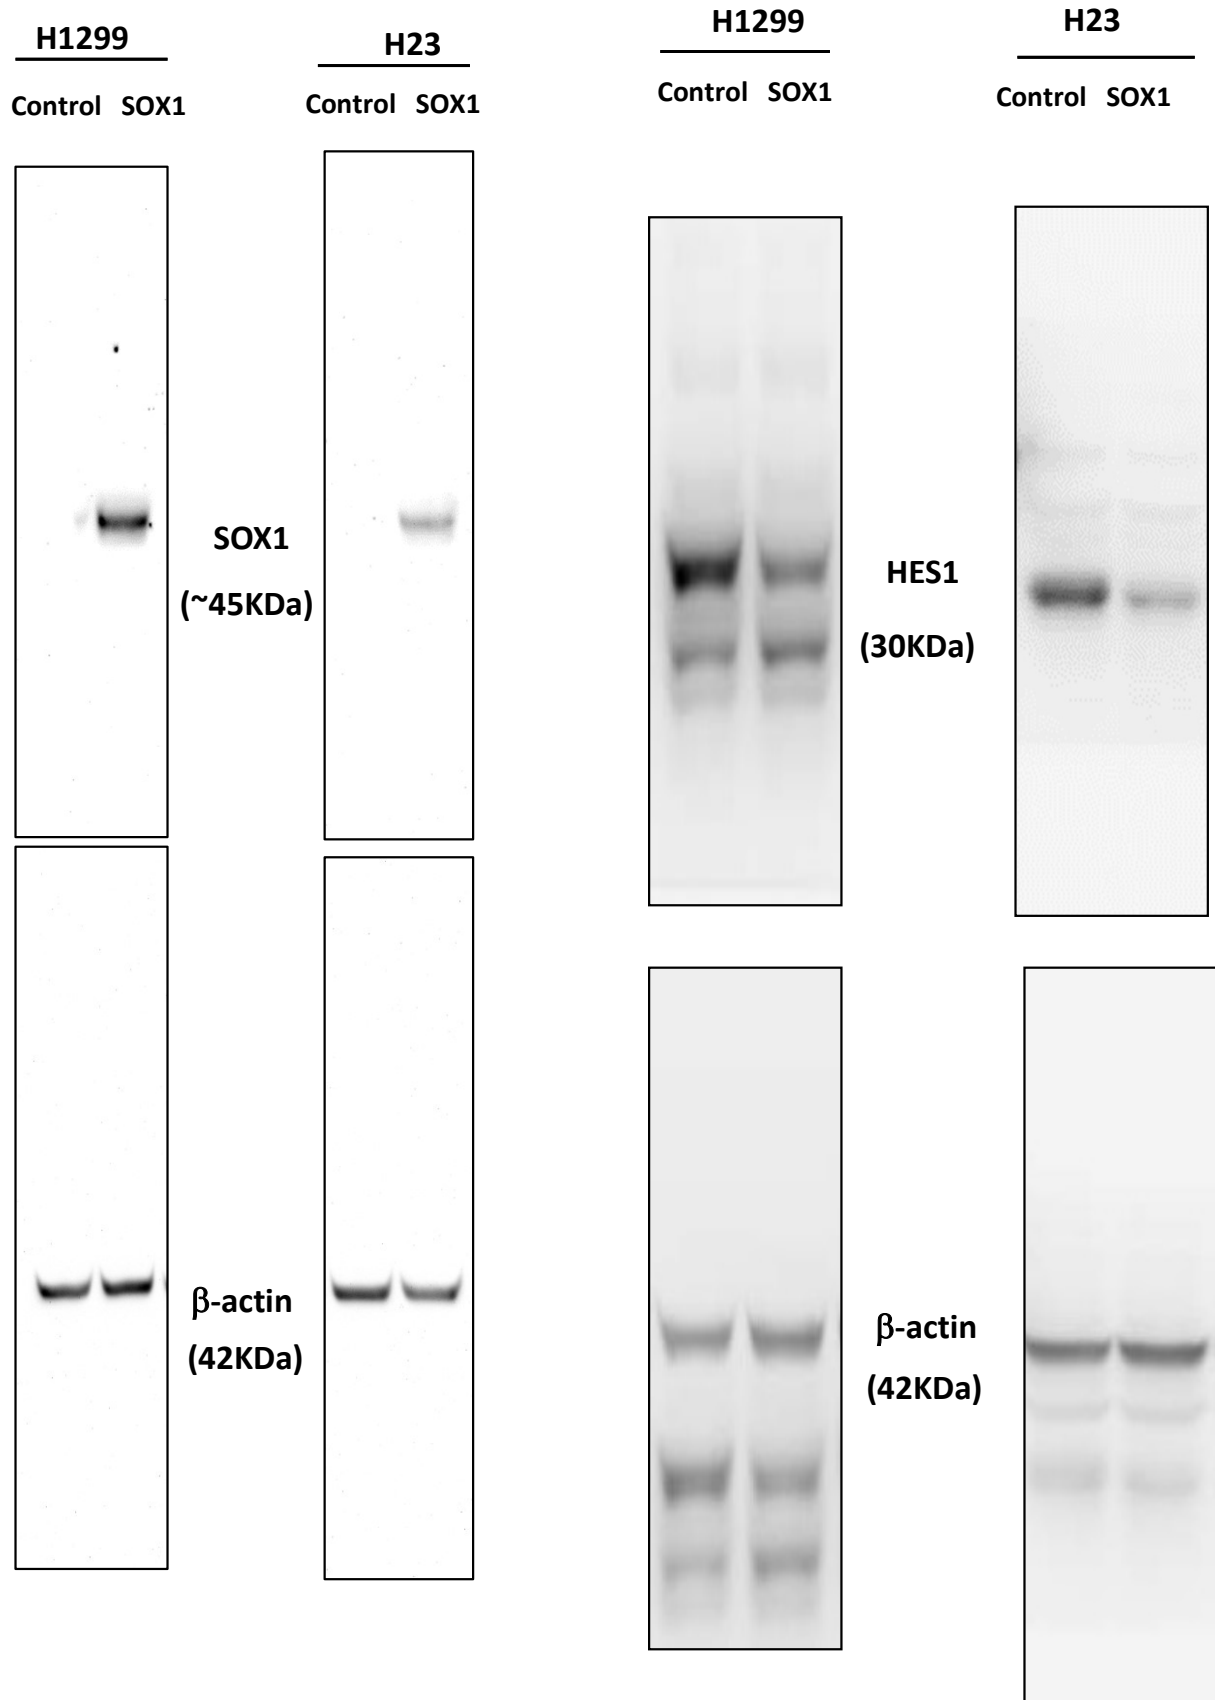

Figure 5 full blot replicate

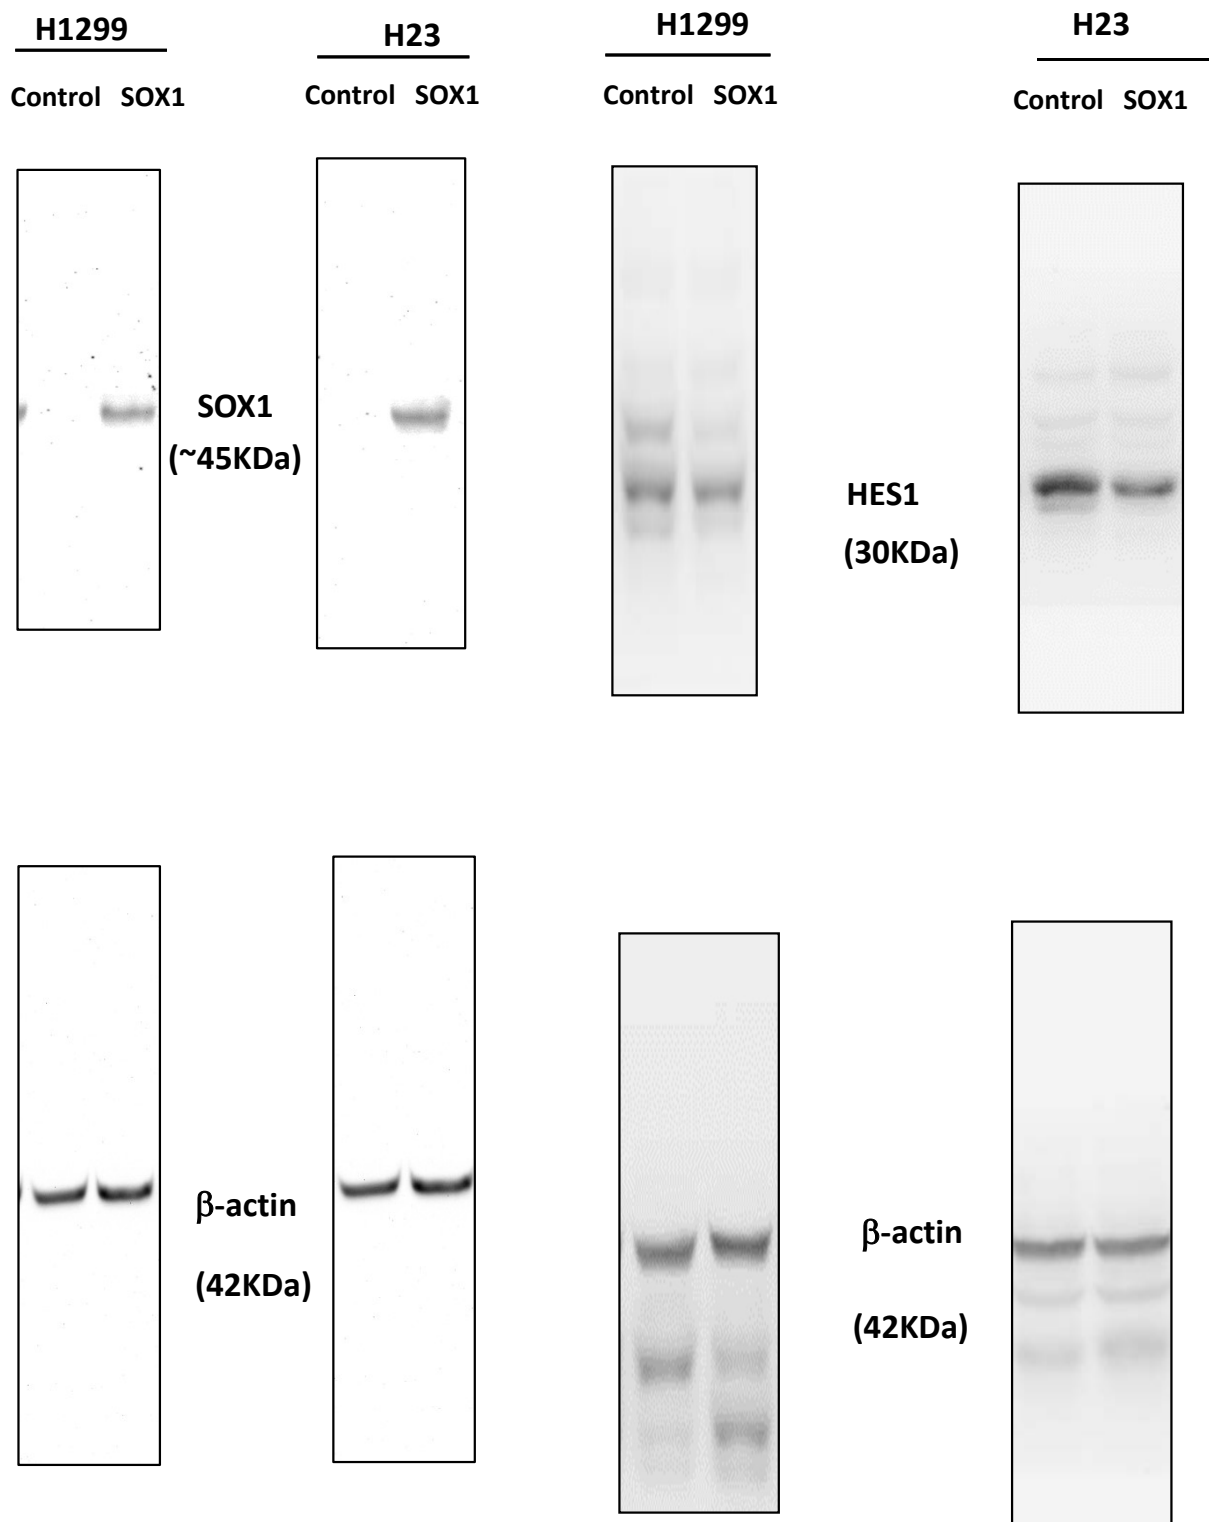



Figure 6 western blot full blot

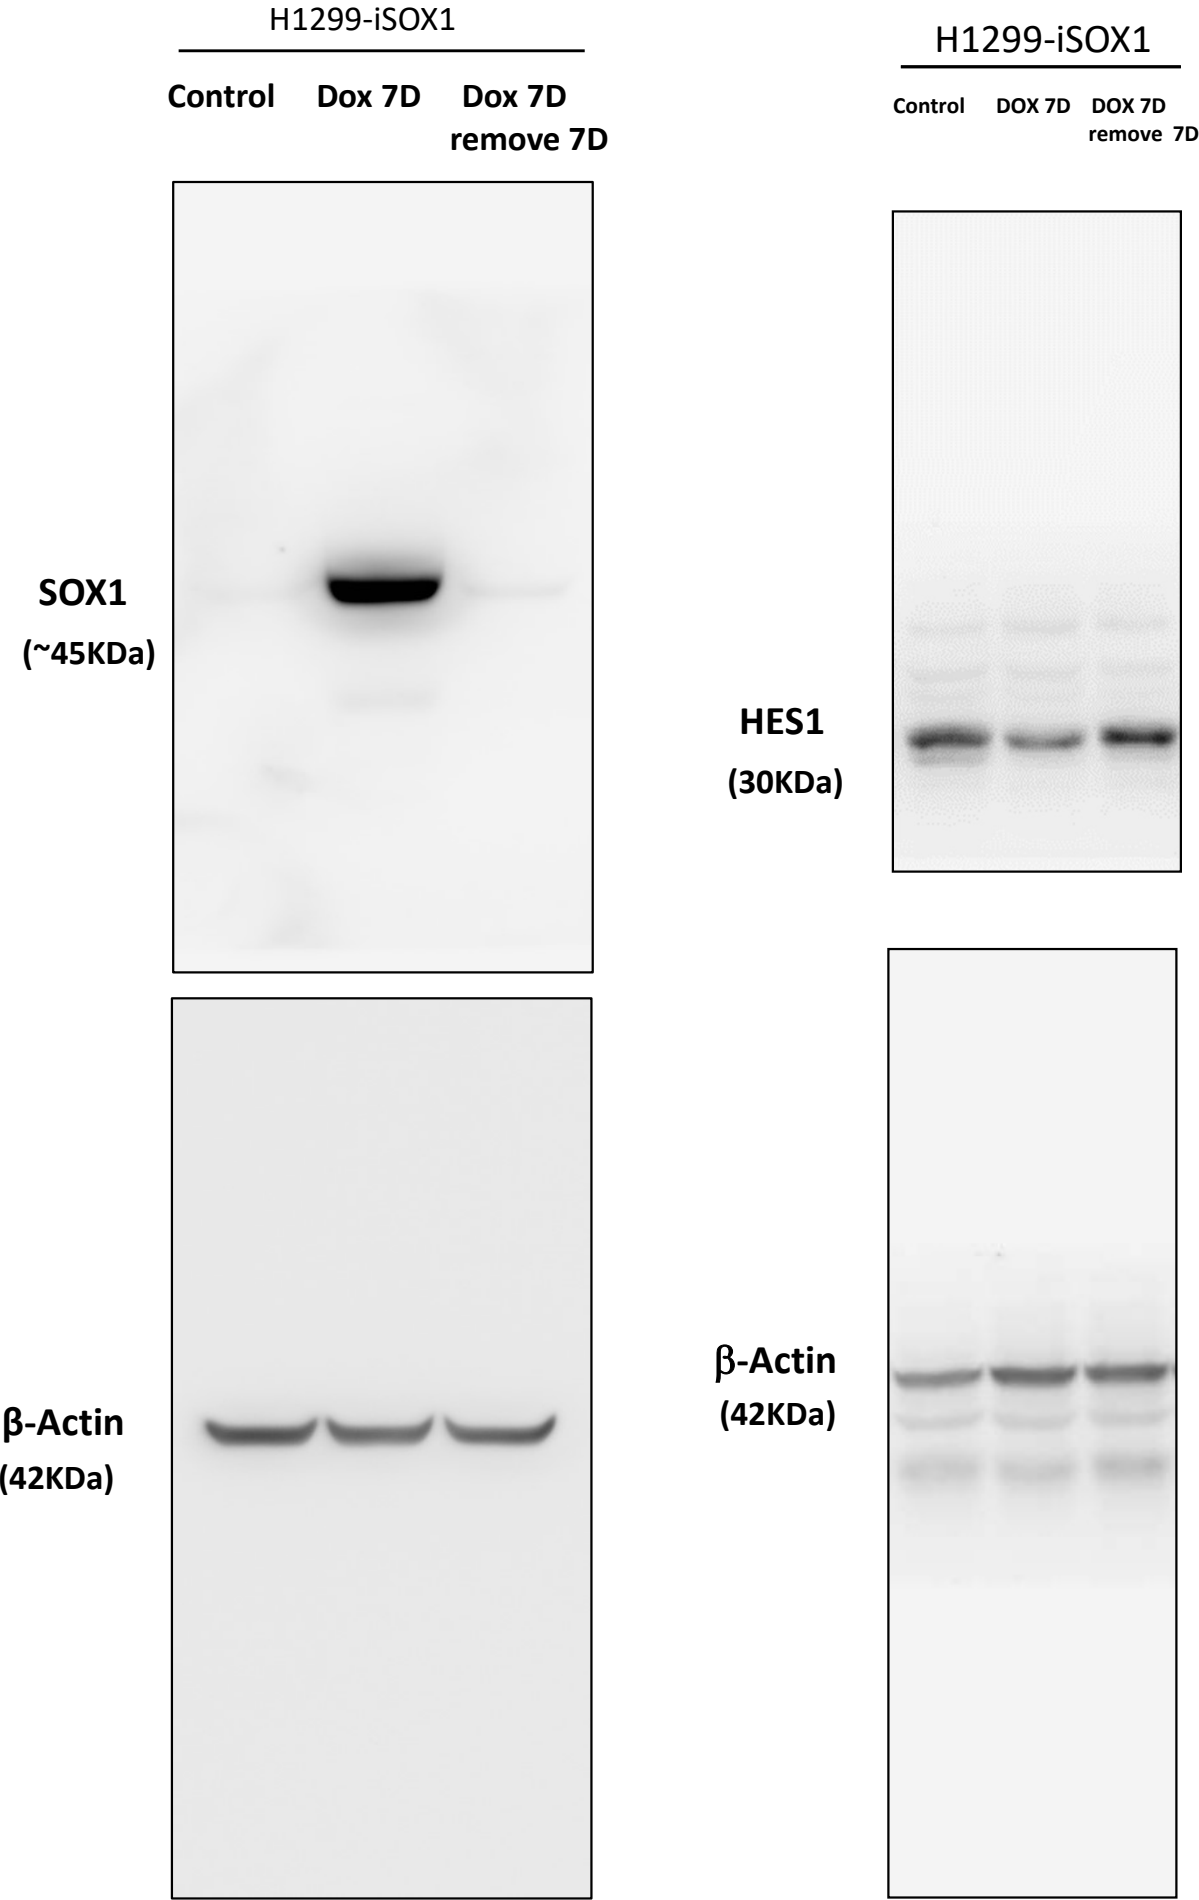

Figure 6 western blot full blot replicate

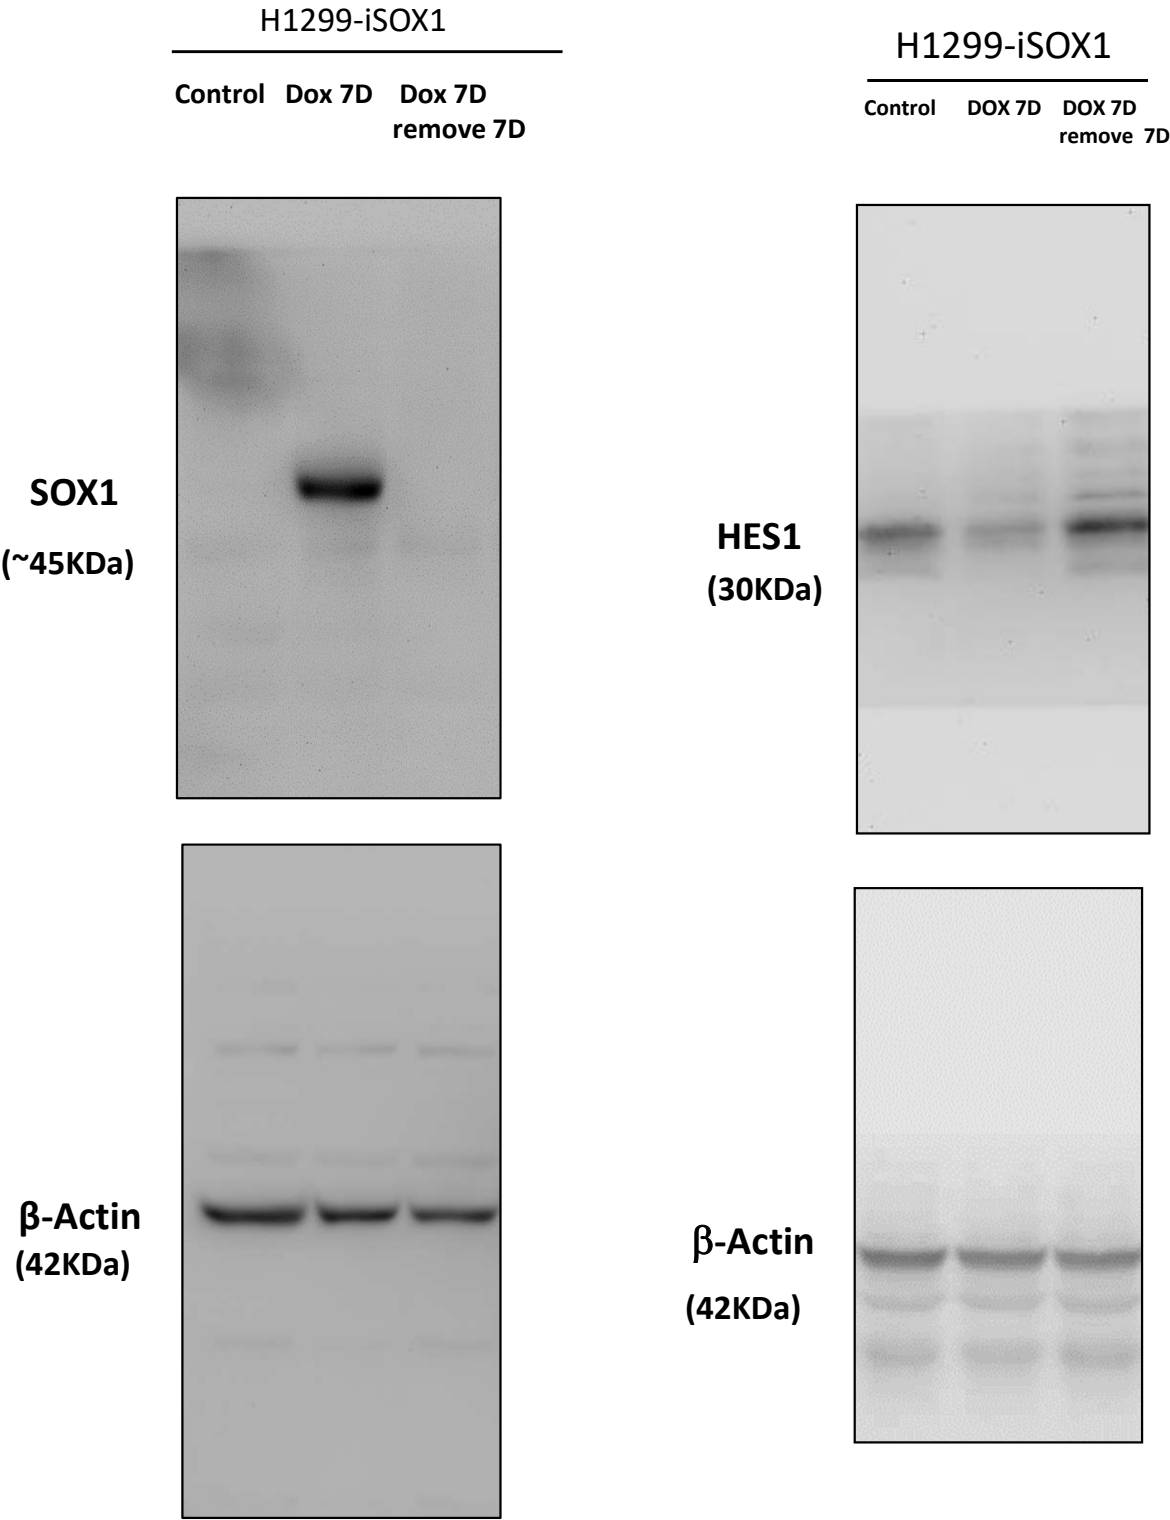

Figure 7 full blot

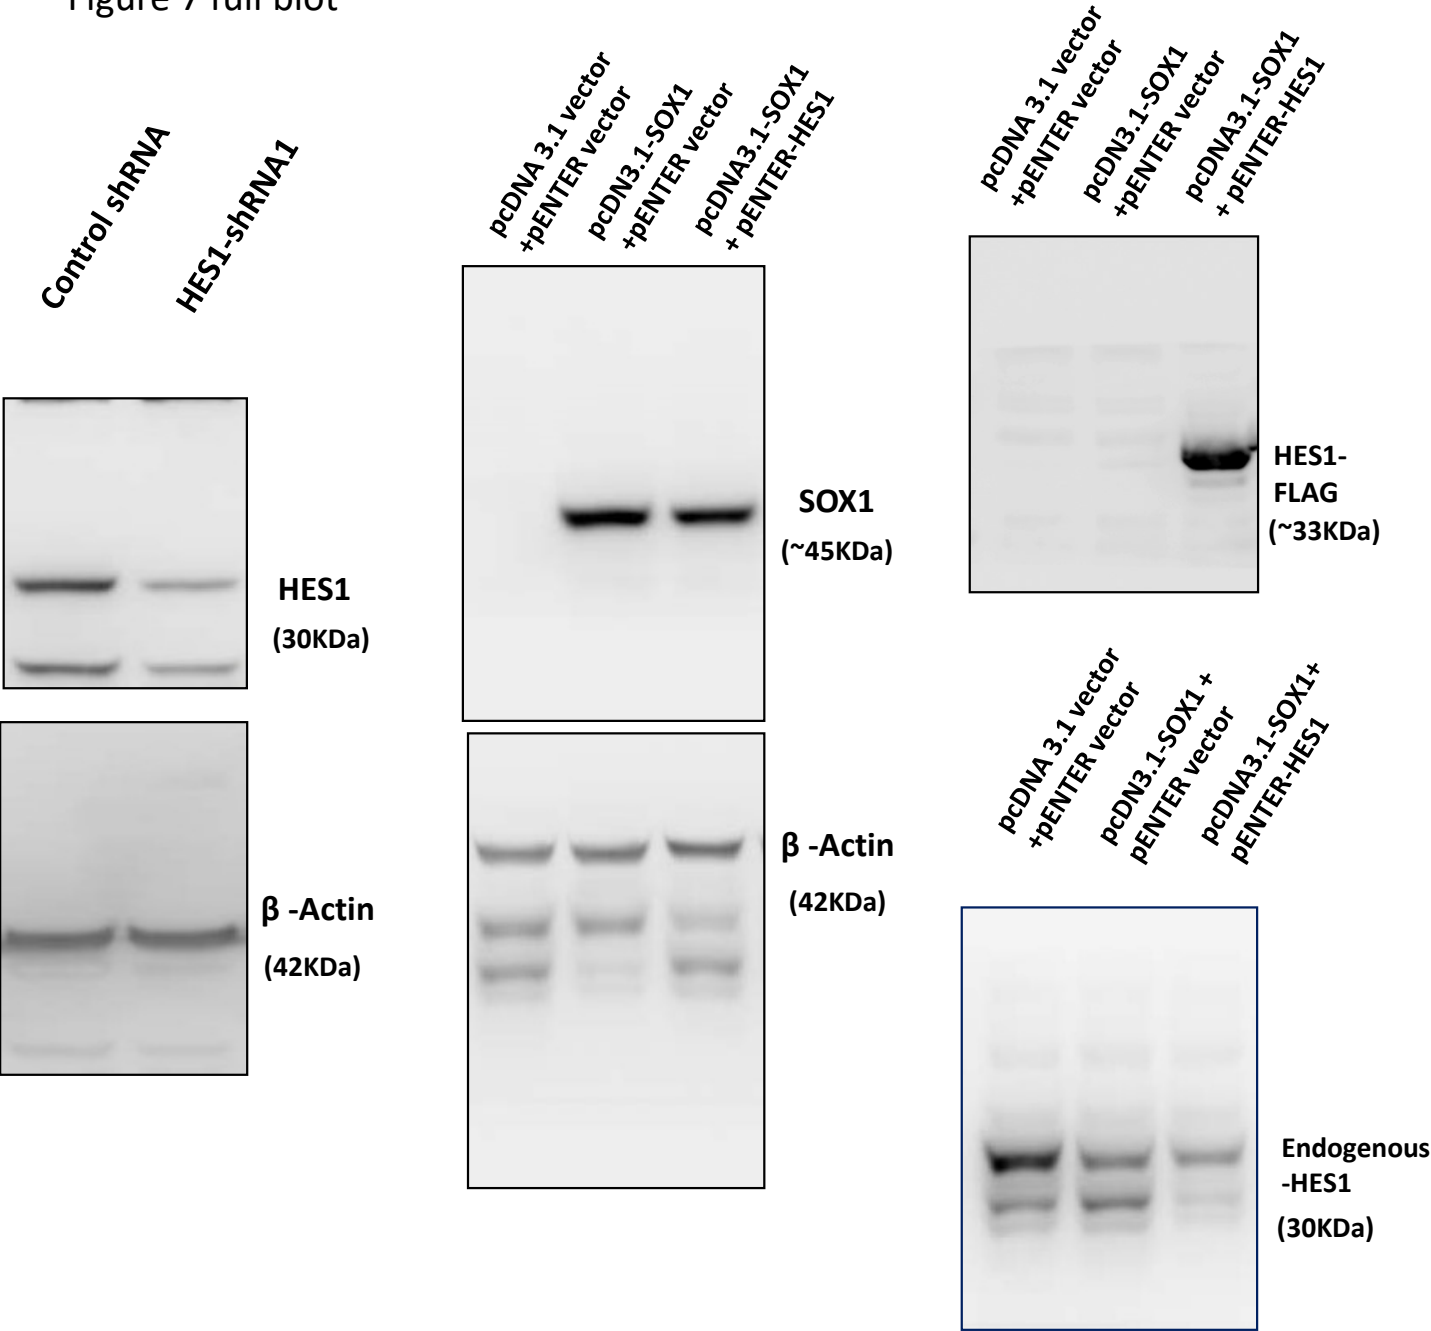

Figure 7 full blot replicate

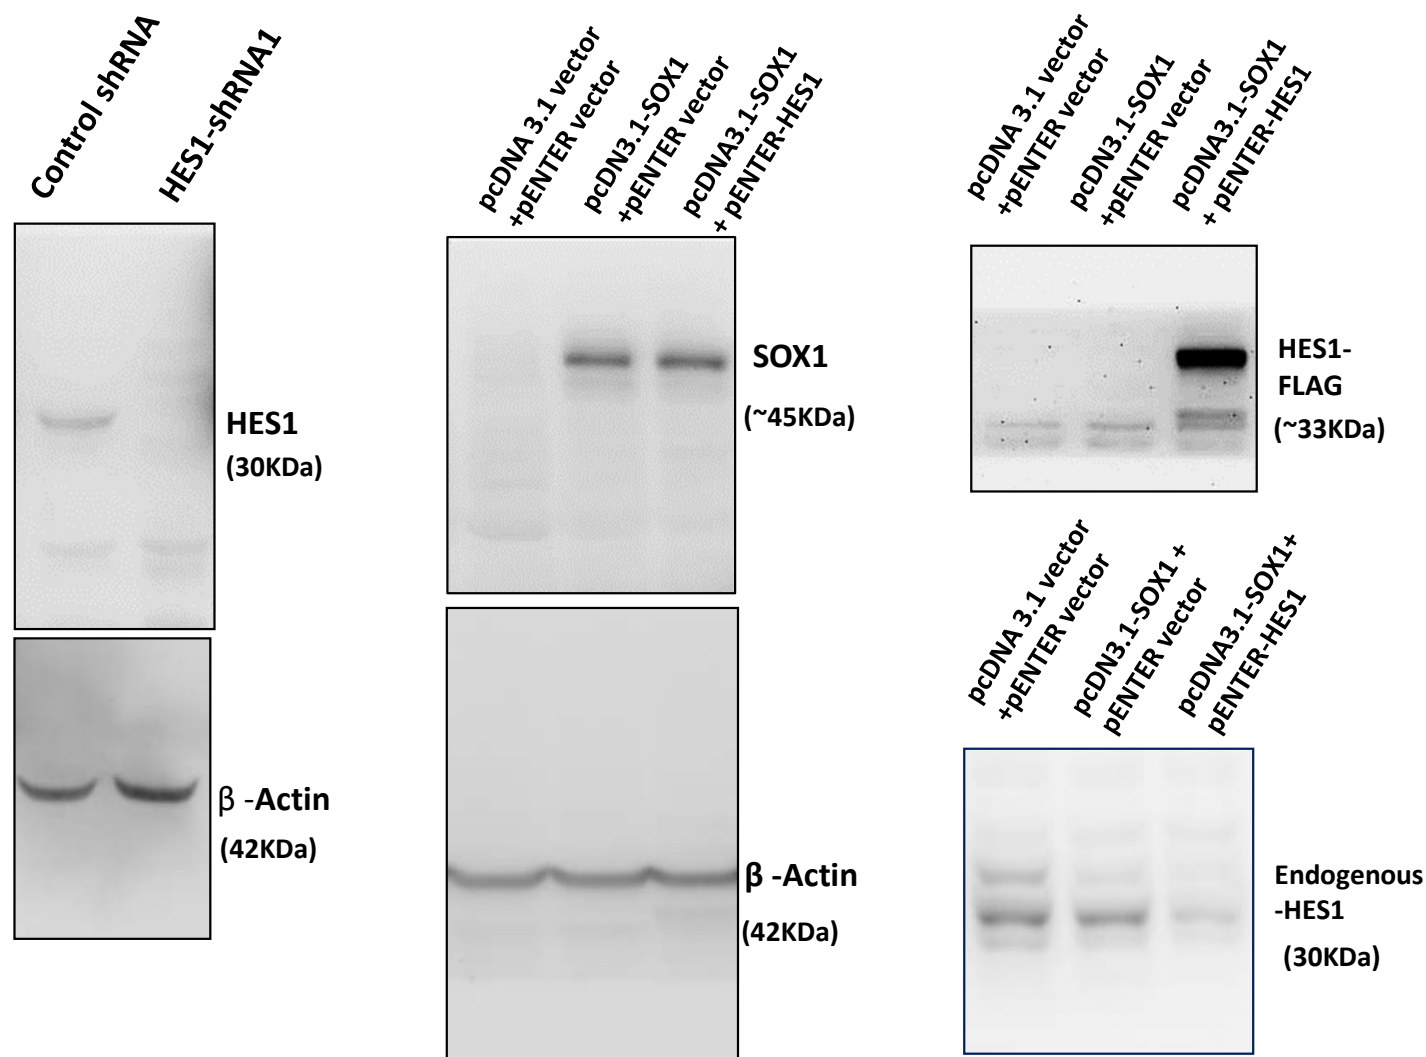

Supplement: s1 [file s1]
